# Supplementary material
Source: Research Square preprint supplement (doi:10.21203/rs.3.rs-9219989/v1)
Supplement: Supplementary file 1 [file 2cf5ba3eafa5e20b35f34c7a.docx]

Online supplemental

Supplementary table 1 Estimated difference in median urinary iodine concentration (UIC)* by supplement use, relevant dietary variables, and thyroid medication (n=347)

|  | **Study population** | **Estimated difference in median UIC, µg/L** | | |
| --- | --- | --- | --- | --- |
|  |  | **Model 0 a** | **Model 1 b** | **Model 2 c** |
|  | **n (%)** | **Beta (95 % CI)** | **Beta (95 % CI)** | **Beta (95 % CI)** |
|  |  |  |  |  |
| Iodine-containing dietary supplement |  |  |  |  |
| Never | 186 (54) | Ref. | Ref. | Ref. |
| Occasionally | 64 (18) | 14 (-10, 38) | 16 (-8, 40) | 19 (-7, 44) |
| Daily or most days | 97 (28) | 32 (9, 54) | 32 (7, 56) | 37 (12, 61) |
|  |  | *p*=0.019 | *p*=0.031 | *p*=0.005 |
|  |  |  |  |  |
| Milk/yoghurt, per dl | 345 (99) | 10 (4.3, 16) | 10 (5, 15) | 11 (6, 17) |
|  |  | *p*=0.001 | *p*<0.001 | *p*<0.001 |
|  |  |  |  |  |
| Lean fish filet, per dinner portion/week d | 347 (100) | 0 (-5, 5) | 0 (-6, 6) | -3 (-13, 7) |
|  |  | *p*=1.00 | *p*=0.91 | *p*=0.54 |
| Thyroid medication, current use |  |  |  |  |
| Not reported | 334 (96) | Ref. | Ref. | Ref. |
| Yes | 13 (3.8) | 77 (-152, 306) | 79 (-37, 194) | 83 (-31, 196) |
|  |  | *p*=0.51 | *p*=0.18 | *p*=0.15 |

* Changes in median urinary iodine are estimated based on quantile regression

a Model 0: Crude – not adjusted for covariates
b Model 1: Adjusted for age, pregnant (yes/no), daily breastfeeding (yes/no) and (pre-pregnancy) BMI (3 categories)
c Model 2: Similar as Model 1 and additionally mutually adjusted for all covariates listed in the table
d One dinner portion equals six portions as spread
